# Supplementary material for: Influence of surface terminal groups on the efficiency of two-electron oxygen reduction reaction catalyzed by iron single atoms on Ti3C2Tx (T = Cl, Br, NH) MXene
Source: Royal Society of Chemistry journal article supplement (doi:10.1039/d4ta02721c), 2024-01-01
Supplement: d4ta02721c1.pdf [file d4ta02721c1.pdf]

## Electronic Supplementary Information

# Influence of the surface terminal groups on the efficiency of two-electron oxygen reduction reaction by iron single atoms on $Ti_3C_2T_x$ ( $T_x=Cl, Br, NH$ ) MXene

Dawid Daniël Kruger,<sup>a</sup> Juan José Delgado,<sup>b</sup> F. Javier Recio,<sup>\*c</sup> Sara Governá-Ferron,<sup>a</sup> Ana Primo<sup>\*a</sup> and Hermenegildo García<sup>\*a</sup>

a. *Instituto Universitario de Tecnología Química CSIC-UPV, Universitat Politècnica de València, Av. De los Naranjos s/n, València, 46022, Spain.*

*E-mail: aprimoar@itq.upv.es*

*E-mail: hgarcia@itq.upv.es*

b. *Material Science and Metallurgy Engineering and Inorganic Chemistry, University of Cádiz, 11510 Puerto Real, Cádiz, Spain.*

c. *Departamento de Química Física Aplicada, Facultad de Ciencias, Universidad Autónoma de Madrid, C/Francisco Tomás y Valiente, 7, Cantoblanco, 28049 Madrid, Spain.*

*E-mail: javier.recioc@uam.es*

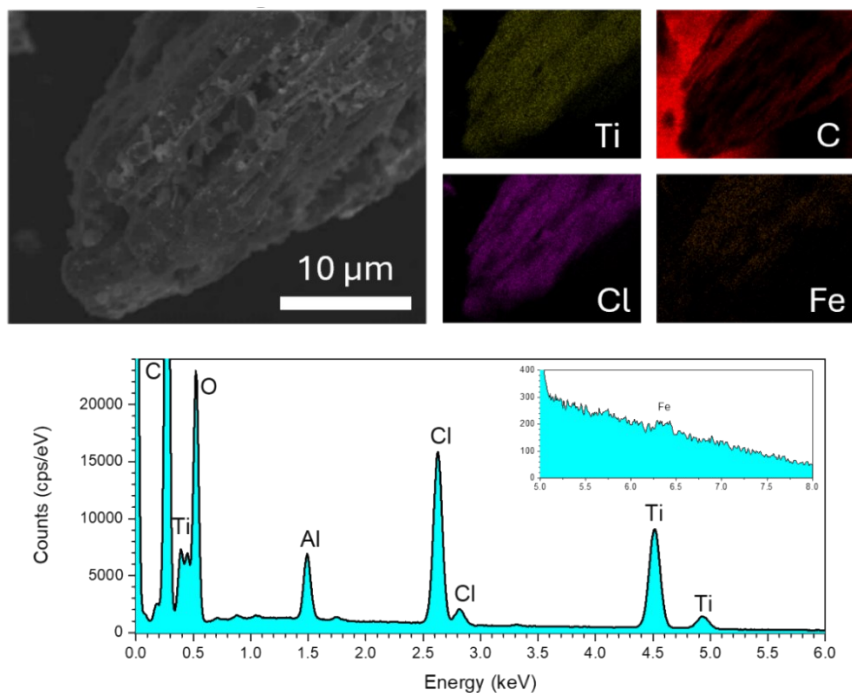

Figure S1 – SEM image of Fe(SA)-Ti<sub>3</sub>C<sub>2</sub>Cl<sub>x</sub> with corresponding EDS maps and spectrum.

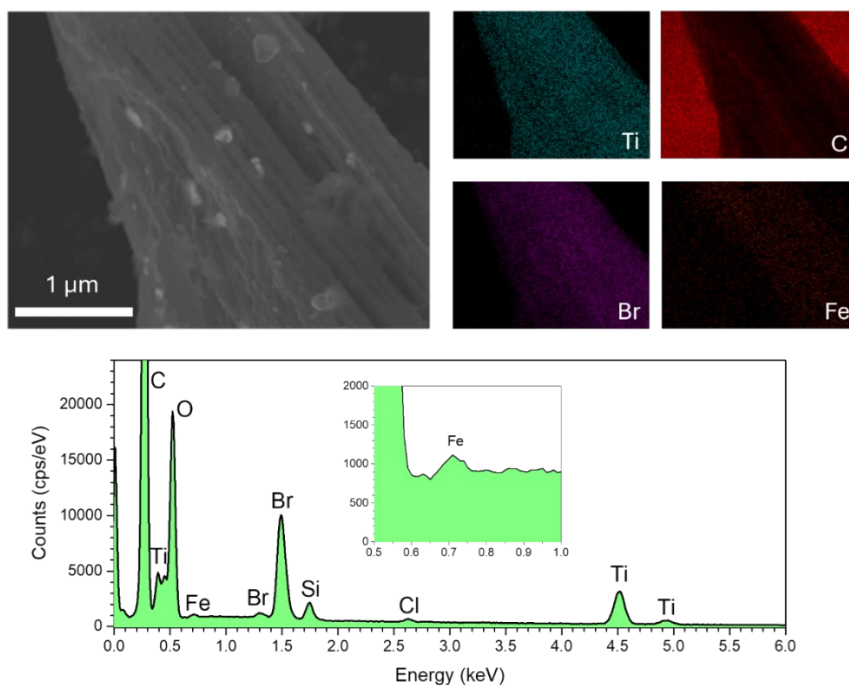

Figure S2 – SEM image of Fe(SA)-Ti<sub>3</sub>C<sub>2</sub>Br<sub>x</sub> with corresponding EDS maps and spectrum.

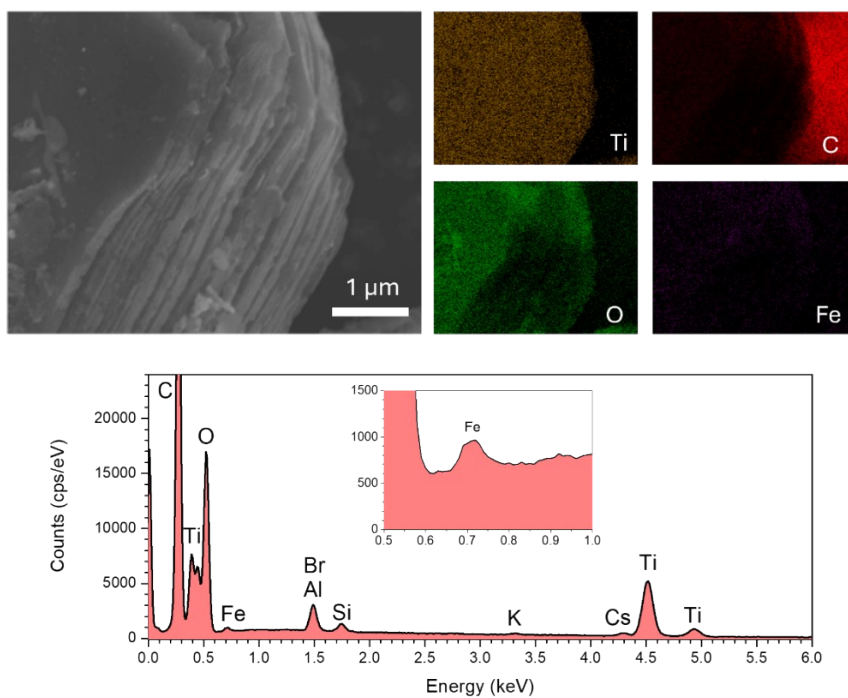

Figure S3 – SEM image of Fe(SA)-Ti<sub>3</sub>C<sub>2</sub>(NH)<sub>x</sub> with corresponding EDS maps and spectrum. Note that the main peak of the N KL transition (0.3924 keV) is masked by the more intense Ti L<sub>III</sub>M<sub>I</sub> (0.3953 keV) and L<sub>II</sub>M<sub>I</sub> (0.4013 keV) peaks.

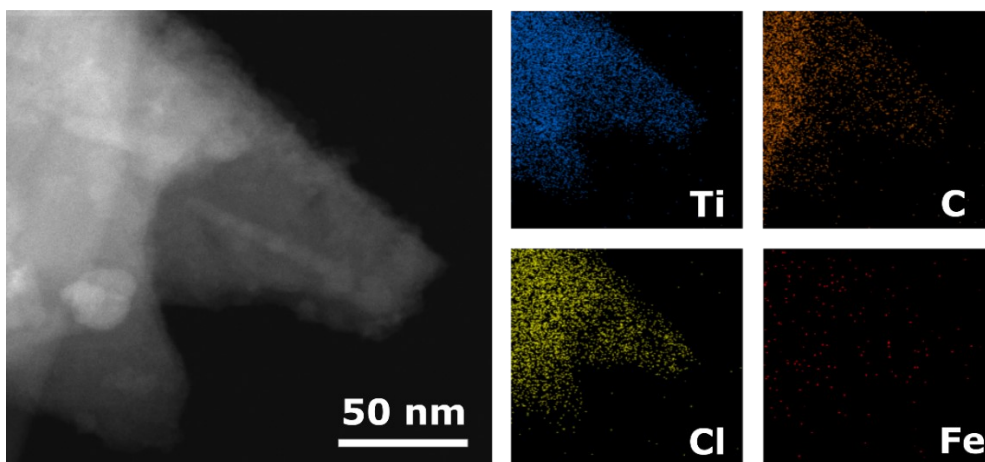

Figure S4– HAADF-STEM image of Fe(SA)-Ti<sub>3</sub>C<sub>2</sub>Cl<sub>x</sub> with corresponding EDX maps.

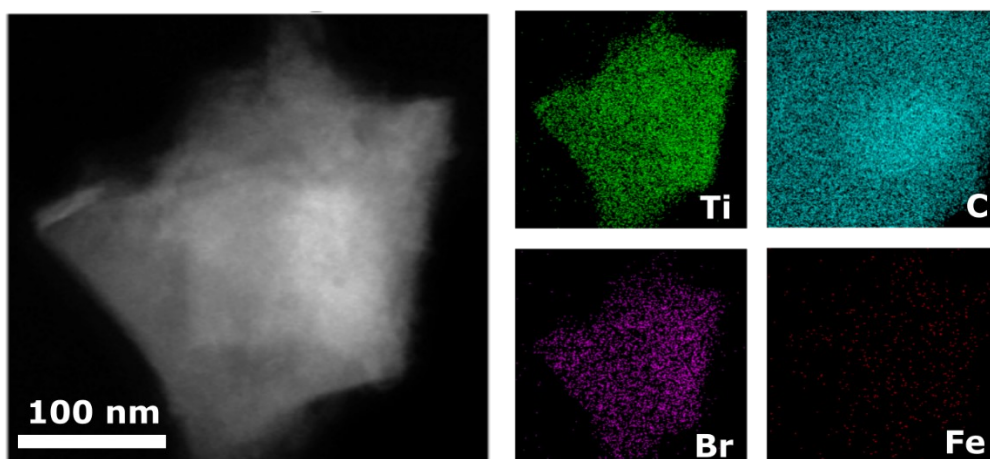

Figure S5– HAADF-STEM image of Fe(SA)-Ti<sub>3</sub>C<sub>2</sub>Br<sub>x</sub> with corresponding EDX maps

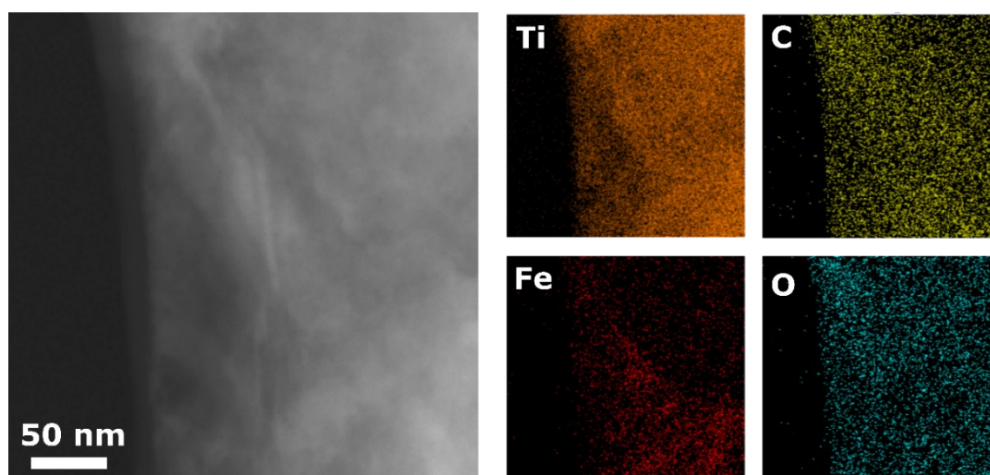

Figure S6– HAADF-STEM image of Fe(SA)-Ti<sub>3</sub>C<sub>2</sub>(NH)<sub>x</sub> with corresponding EDX maps.

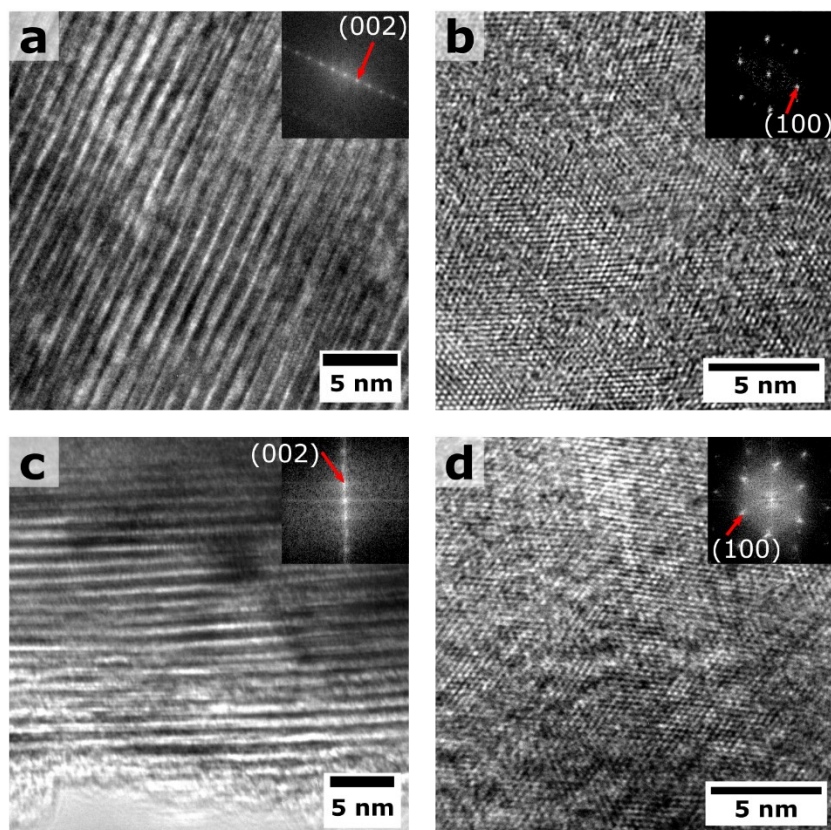

Figure S7 – High resolution transmission electron microscope images showing (a) Fe(SA)-Ti<sub>3</sub>C<sub>2</sub>Cl<sub>x</sub> as viewed perpendicular to the <001> zone axis, (b) Fe(SA)-Ti<sub>3</sub>C<sub>2</sub>Cl<sub>x</sub> as viewed along the <001> zone axis, (c) Fe(SA)-Ti<sub>3</sub>C<sub>2</sub>Br<sub>x</sub> as viewed perpendicular to the <001> zone axis, (d) Fe(SA)-Ti<sub>3</sub>C<sub>2</sub>Br<sub>x</sub> as viewed along the <001> zone axis, with insets showing the FFT patterns.

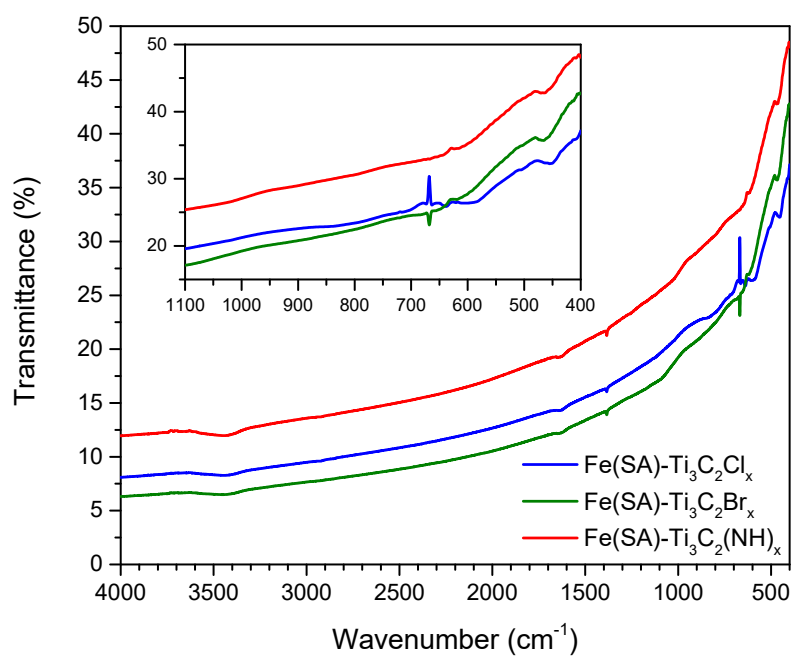

Figure S8 – ATR-FTIR spectra of the Fe(SA)-Ti<sub>3</sub>C<sub>2</sub>T<sub>x</sub> samples under study. The inset shows and expansion of the low frequency region showing the shift of the characteristic Ti-C skeletal vibration between 500 and 450 cm<sup>-1</sup>.

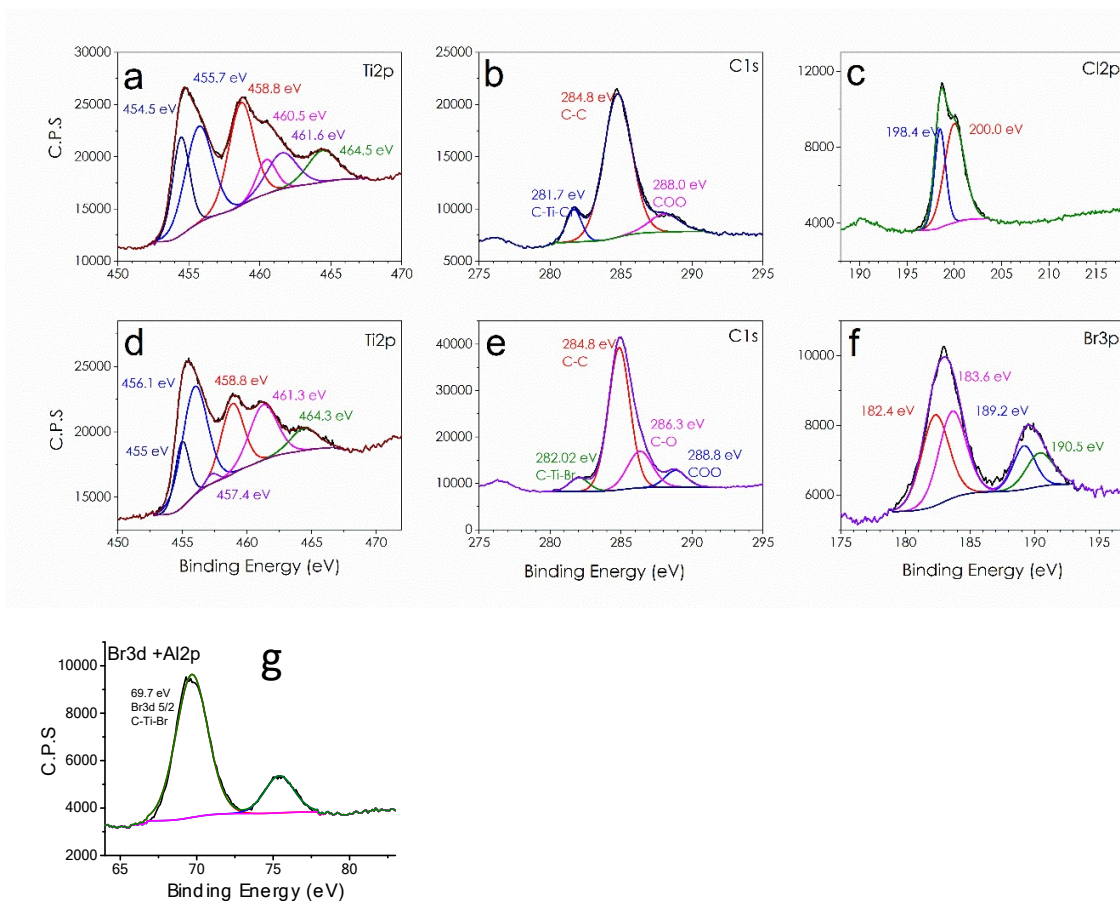

Figure S9 – High resolution XPS of (a) Ti 2p, (b) C 1s, and (c) Cl 2p levels of Fe(SA)-Ti<sub>3</sub>C<sub>2</sub>Cl<sub>2</sub>, and (d) Ti 2p, (e) C 1s, (f) Br 3p and (g) Br 3d and Al 2p levels of Fe(SA)-Ti<sub>3</sub>C<sub>2</sub>Br<sub>x</sub> MXene samples, with the corresponding deconvolution to individual components.

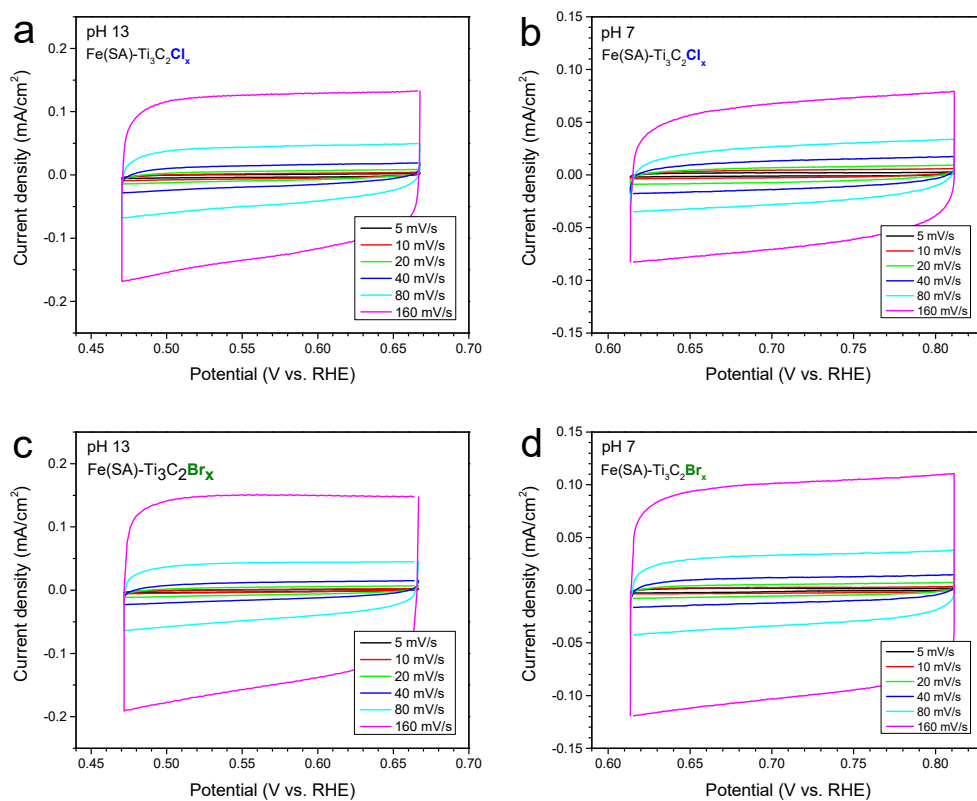

Figure S10 - Cyclic voltammetry curves of Fe(SA)-Ti<sub>3</sub>C<sub>2</sub>Cl<sub>x</sub> in N<sub>2</sub> purged (a) 0.1 M KOH, and, (b) 0.5 M Na<sub>2</sub>SO<sub>4</sub> and Fe(SA)-Ti<sub>3</sub>C<sub>2</sub>Br<sub>x</sub> in N<sub>2</sub> purged (c) 0.1 M KOH, and (d) 0.5 M Na<sub>2</sub>SO<sub>4</sub>, at various scan rates to determine the double-layer capacitance (C<sub>dl</sub>).



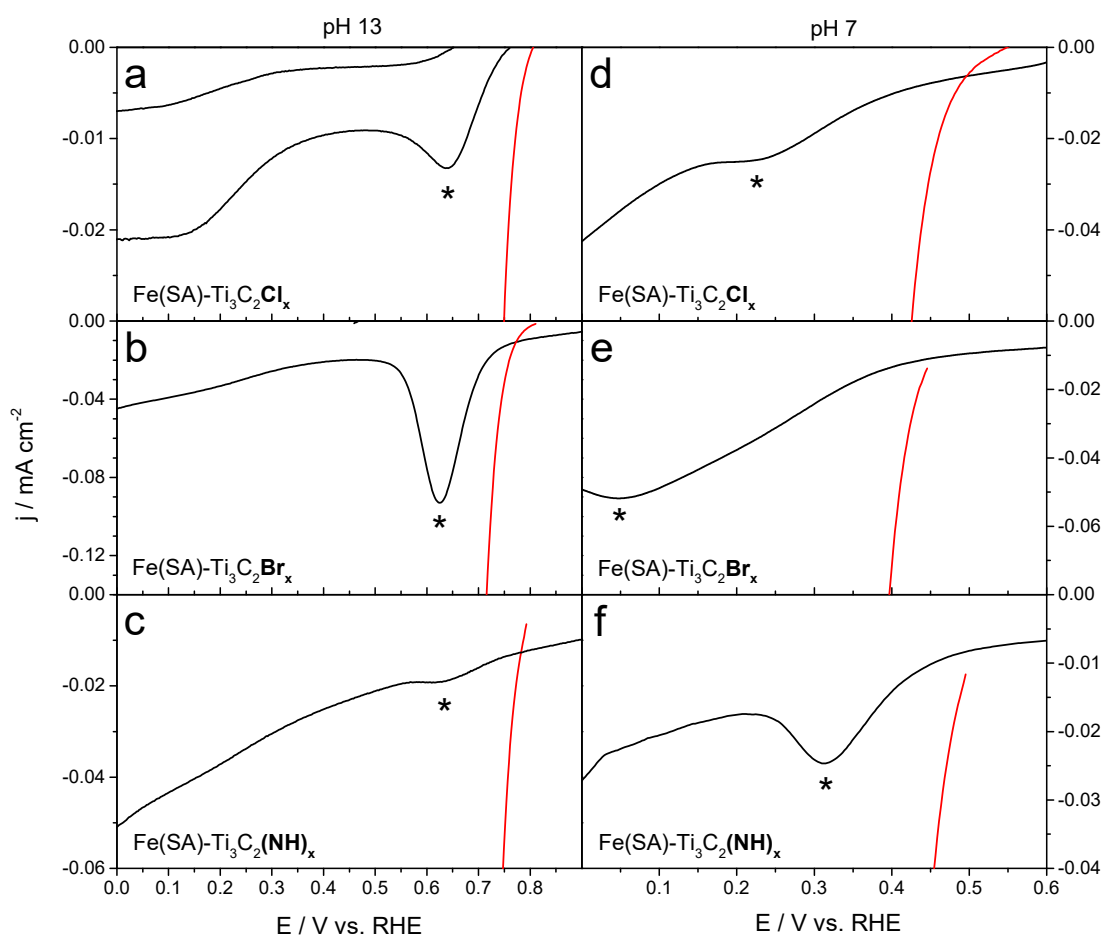

Figure S11 - Cyclic voltammety curves in N<sub>2</sub> purged 0.1 M KOH of (a) of Fe(SA)-Ti<sub>3</sub>C<sub>2</sub>Cl<sub>x</sub>, (b) Fe(SA)-Ti<sub>3</sub>C<sub>2</sub>Br<sub>x</sub>, and (c) Fe(SA)-Ti<sub>3</sub>C<sub>2</sub>(NH)<sub>x</sub>, and in N<sub>2</sub> purged 0.5 M Na<sub>2</sub>SO<sub>4</sub> of (d) of Fe(SA)-Ti<sub>3</sub>C<sub>2</sub>Cl<sub>2</sub>, (e) Fe(SA)-Ti<sub>3</sub>C<sub>2</sub>Br<sub>x</sub>, and (f) Fe(SA)-Ti<sub>3</sub>C<sub>2</sub>(NH)<sub>x</sub>, at a scan rate of 5 mV s<sup>-1</sup>. Peaks likely associated with the reduction of Fe(III) to Fe(II) are indicated by asterisks symbols (\*). The corresponding ORR kinetic currents after saturation with O<sub>2</sub> are shown in red.

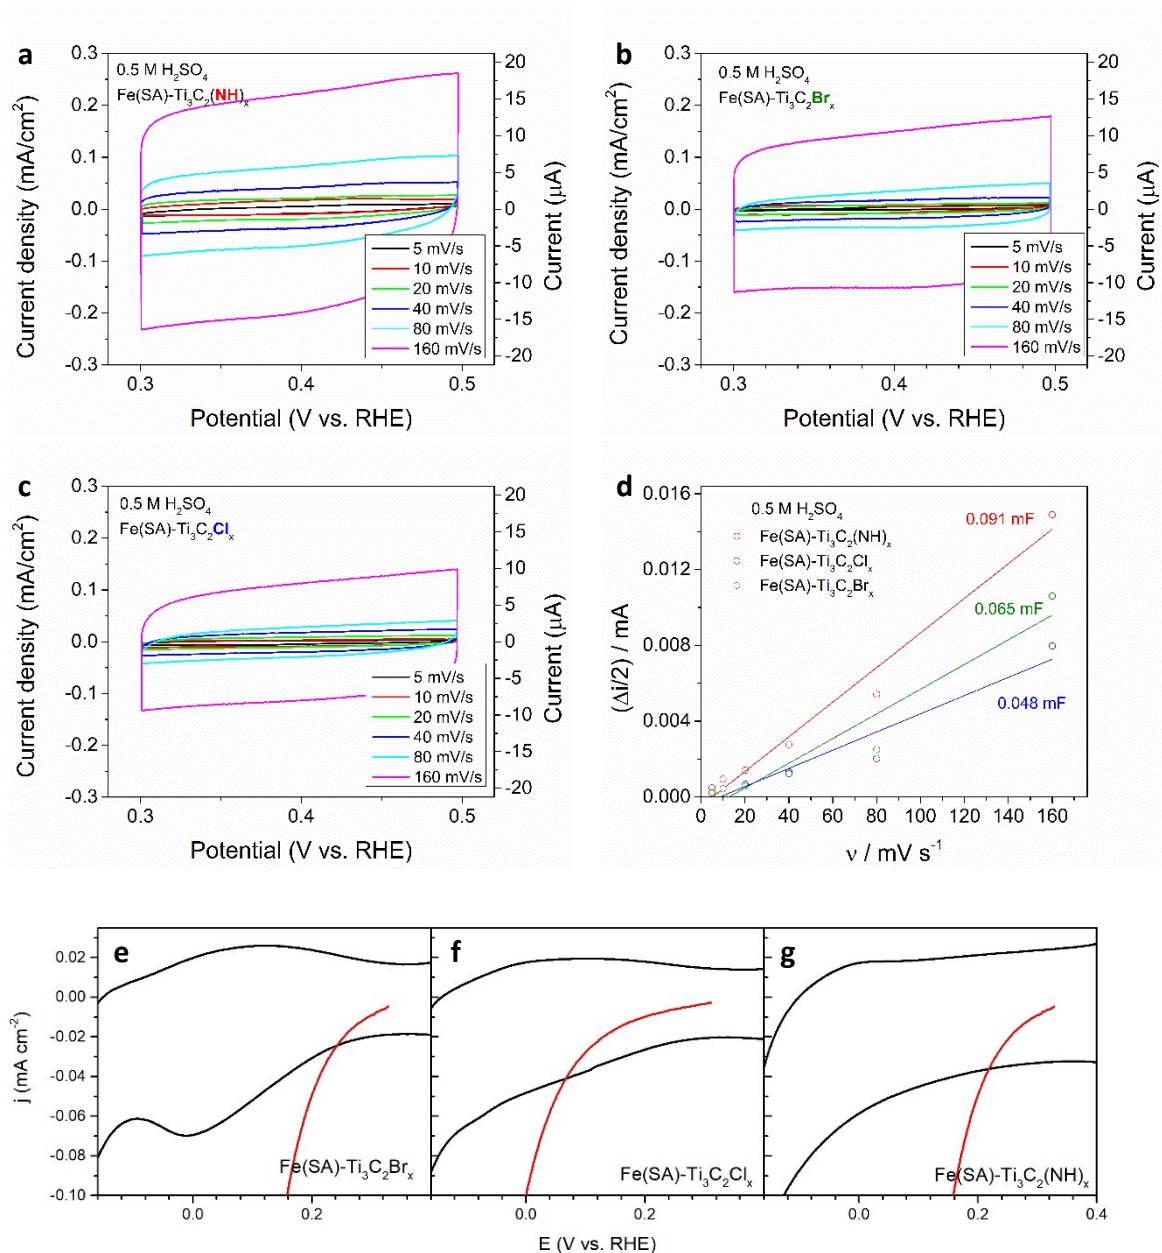

Figure S12 – (a-c) Cyclic voltammetry plots of Fe(SA)-Ti<sub>3</sub>C<sub>2</sub>T<sub>x</sub> (T=Cl, Br, NH) recorded at various scan rates in N<sub>2</sub> purged 0.5 M H<sub>2</sub>SO<sub>4</sub>. (d) C<sub>dl</sub> determination from cyclic voltammetry measurements of Fe(SA)-Ti<sub>3</sub>C<sub>2</sub>T<sub>x</sub> samples. Cyclic voltammetry curves (black lines) at a scan rate of 5 mV s<sup>-1</sup> in N<sub>2</sub> purged 0.5 M H<sub>2</sub>SO<sub>4</sub> measured for (e) Fe(SA)-Ti<sub>3</sub>C<sub>2</sub>Br<sub>x</sub>, (f) Fe(SA)-Ti<sub>3</sub>C<sub>2</sub>Cl<sub>x</sub>, and (g) Fe(SA)-Ti<sub>3</sub>C<sub>2</sub>(NH)<sub>x</sub>. The red lines in plots e-f show the corresponding ORR current measured for these electrodes under O<sub>2</sub>-saturated electrolyte.

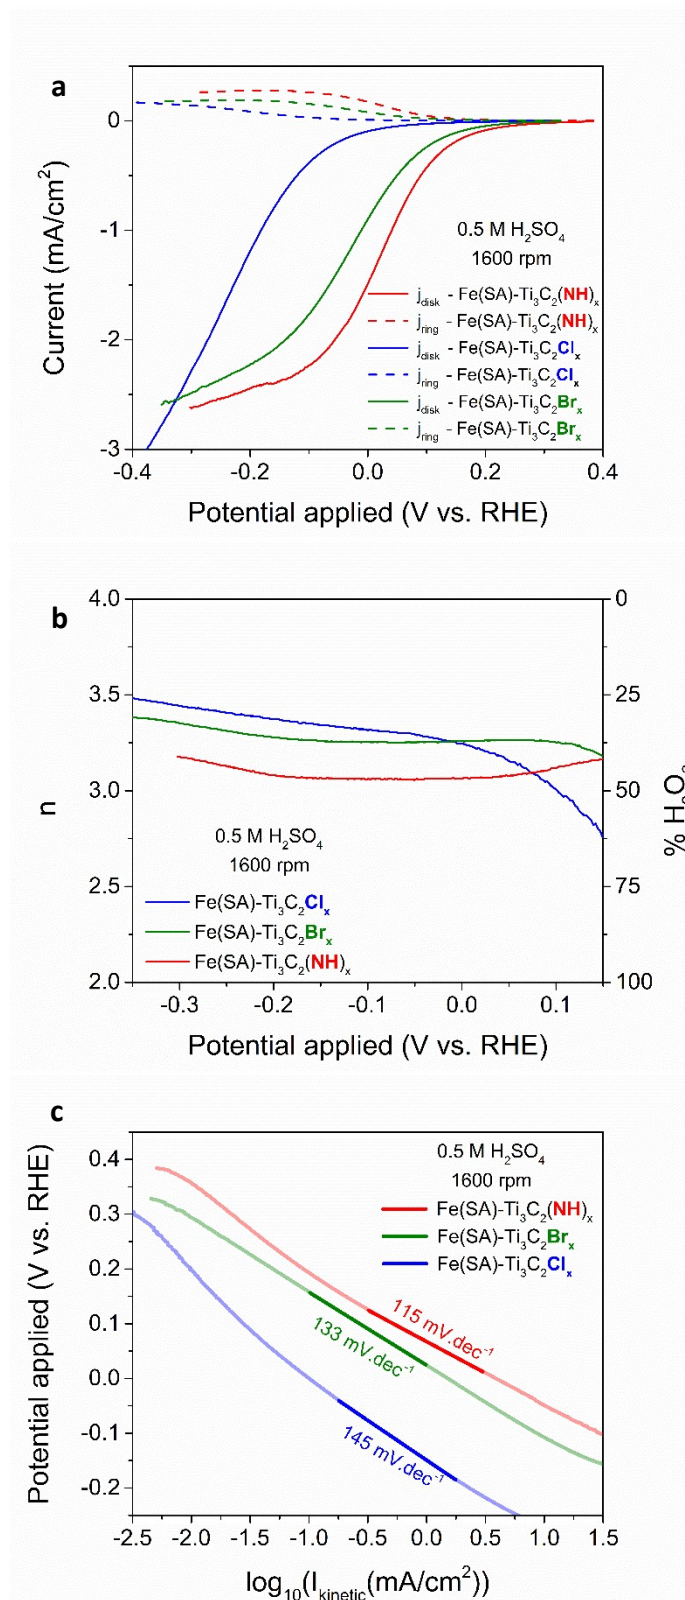

Figure S13 - (a) RRDE linear sweep voltammetry polarization curves recorded at 0.005 V s<sup>-1</sup> of Fe(SA)-Ti<sub>3</sub>C<sub>2</sub>T<sub>x</sub> (T = Cl, Br, NH) in O<sub>2</sub> saturated 0.5 M H<sub>2</sub>SO<sub>4</sub> electrolyte (normalised to disk area), with (b) corresponding electron transfer numbers, n, and H<sub>2</sub>O<sub>2</sub> selectivity, and (c) Tafel slopes in the kinetic region.

Table S1 - Electrochemical characterization data in H<sub>2</sub>SO<sub>4</sub> electrolyte of the Ti<sub>3</sub>C<sub>2</sub>T<sub>x</sub> (T = Cl, Br, NH) MXenes under study.

| Catalyst                                                | E <sub>onset</sub><br>(V vs. RHE) | n e <sup>-a</sup> | E <sub>red</sub><br>(V vs. RHE) | C <sub>dl</sub> (mF) | ECSA,<br>(m <sup>2</sup> g <sup>-1</sup> ) |
|---------------------------------------------------------|-----------------------------------|-------------------|---------------------------------|----------------------|--------------------------------------------|
| <i>0.5 M H<sub>2</sub>SO<sub>4</sub></i>                |                                   |                   |                                 |                      |                                            |
| Fe(SA)-Ti <sub>3</sub> C <sub>2</sub> Cl <sub>2</sub>   | -0.007                            | 3.24              | -                               | 0.048                | 17.0                                       |
| Fe(SA)-Ti <sub>3</sub> C <sub>2</sub> Br <sub>x</sub>   | 0.167                             | 3.26              | -0.01                           | 0.065                | 23.0                                       |
| Fe(SA)-Ti <sub>3</sub> C <sub>2</sub> (NH) <sub>x</sub> | 0.181                             | 3.07              | -                               | 0.091                | 32.2                                       |

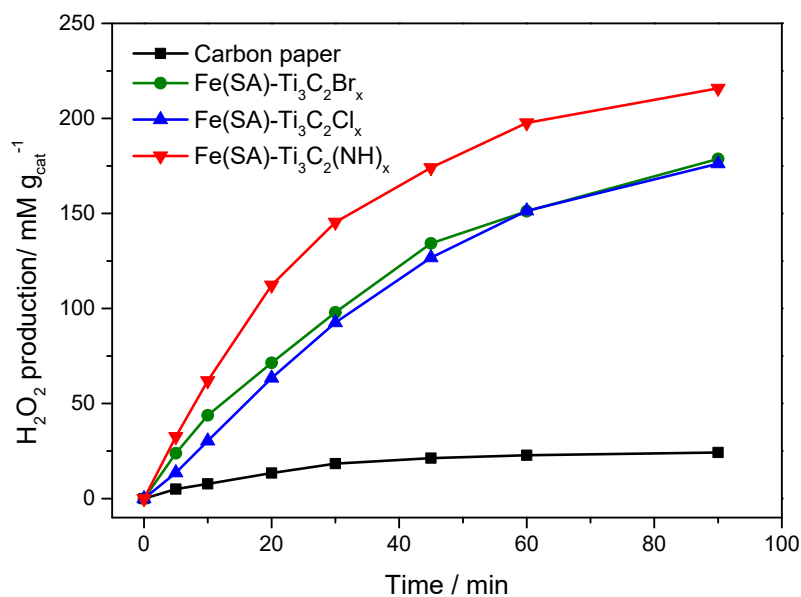

Figure S14 – Quantification of electrochemically produced H<sub>2</sub>O<sub>2</sub> in 0.05 M Na<sub>2</sub>SO<sub>4</sub> electrolyte in a prototype cell with Fe(SA)-Ti<sub>3</sub>C<sub>2</sub>T<sub>x</sub> electrocatalysts deposited onto carbon paper as air cathodes. Detection of H<sub>2</sub>O<sub>2</sub> was determined by complexation with titanium (IV) oxysulfate and subsequent measurement of UV-Vis absorbance at 410 nm.

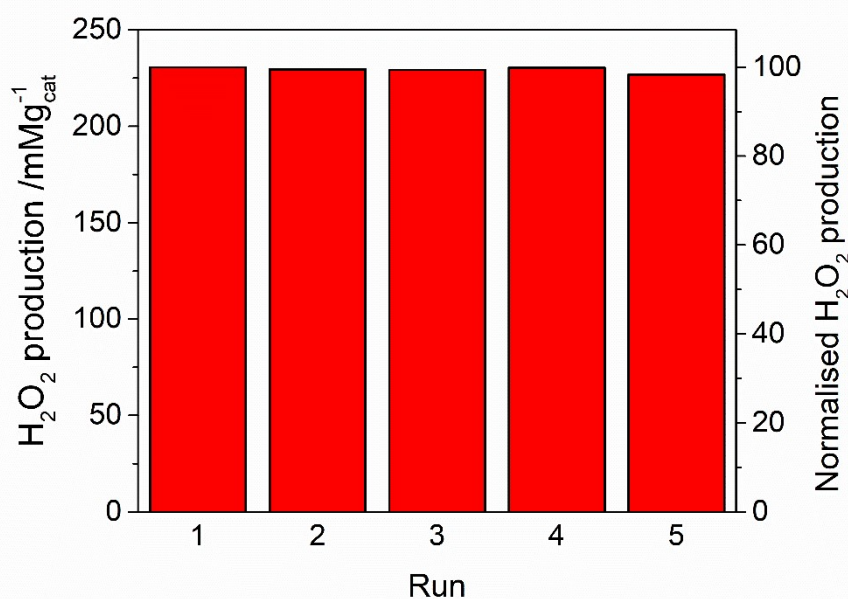

Figure S15 – Repeat electrochemical  $\text{H}_2\text{O}_2$  generation tests for a  $\text{Fe}(\text{SA})\text{-Ti}_3\text{C}_2(\text{NH})_x$  modified carbon paper air cathode in 0.05 M  $\text{Na}_2\text{SO}_4$  electrolyte in a prototype cell. Detection of  $\text{H}_2\text{O}_2$  was measured after 90 minutes for each repeat run.
